# Supplementary material
Source: publisher figshare collection journal article supplement (https://acs.figshare.com/ndownloader/files/24157313)
Supplement: Supplementary file 1 [file 24157313]

# Supporting information for,

A Facile Mechanochemical Approach To Synthesizing Edible Food Preservation Coatings Based On Alginate/Ascorbic Acid-Layered Double Hydroxide Bio-Nanohybrids

*<sup>1</sup>Chamalki Madhusa , <sup>1,2</sup>Imalka Munaweera , <sup>3</sup>Veranja Karunaratne , <sup>1,4</sup>Nilwala*

*Kottegoda \**

<sup>1</sup> Department of Chemistry, Faculty of Applied Sciences, University of Sri

Jayewardenepura, Gangodawila, Nugegoda, Sri Lanka.

<sup>2</sup> Instrument Center, Faculty of Applied Sciences, University of Sri Jayewardenepura,

Gangodawila, Nugegoda, Sri Lanka.

<sup>3</sup> Department of Chemistry, Faculty of Science, University of Peradeniya, Peradeniya

20400, Sri Lanka

<sup>4</sup> Center for Advanced Materials Research (CAMR), Faculty of Applied Sciences,

University of Sri Jayewardenepura, Gangodawila, Nugegoda, Sri Lanka.

\*E-mail: [nilwala@sjp.ac.lk](mailto:nilwala@sjp.ac.lk), Telephone: +94773830313

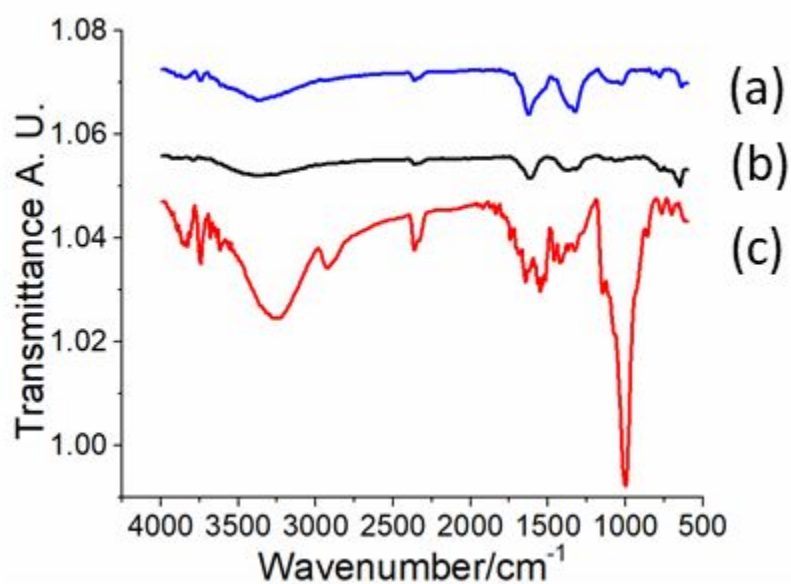

**Figure S1.** FTIR Spectra of (a) Alginate-AA-LDHs and glycerol coating solution (b) Mechanochemically ground AA-LDHs (c) Sodium Alginate and glycerol coating solution

**Table S1.:** Kinetic models used to analyze the release behavior of AA from AA-LDHs and

Alginate coated AA-LDHs

| Model           | Equation                                         | Reference    |
|-----------------|--------------------------------------------------|--------------|
| Avrami-Erofe'ev | $\ln(-\ln(C_t/C_0)) = n \ln(k_d) + n \ln(t-t_0)$ | <sup>1</sup> |
| Elovich         | $1-C_t/C_0 = a \ln(t-t_0) + b$                   | <sup>2</sup> |
| Freundlich      | $\ln(1-C_t/C_0) = \ln(k_d) + a \ln(t-t_0)$       | <sup>3</sup> |
| First-order     | $\ln(C_t/C_0) = -k_d(t-t_0)$                     | <sup>4</sup> |

\* $C_0$  is the amount of guest ascorbic acid in AA-LDHs at  $t=0$   $C_t$  is the amount of guest ascorbic acid in the AA-LDHs at time  $t$  and  $k_d$  is the rate of releasing while  $a, b$  and  $n$  are constants.<sup>5</sup>

**Table S2:**  $R^2$  values of applied kinetic models

| Kinetic Model | $R^2$ value for AA-LDHs | $R^2$ value for Alginate coated AA-LDHs |
|---------------|-------------------------|-----------------------------------------|
|               |                         |                                         |

|                   |      |      |
|-------------------|------|------|
| Avrami-Erofe'ev   | 0.98 | 0.94 |
| Elovich model     | 0.73 | 0.77 |
| Freundlich model  | 0.97 | 0.96 |
| First order model | 0.97 | 0.83 |

## REFERENCES

1. Vyazovkin, S.; Dollimore, D., Linear and nonlinear procedures in isoconversional computations of the activation energy of nonisothermal reactions in solids. *Journal of chemical information and computer sciences* **1996**, *36* (1), 42-45.
2. Juang, R.-S.; Chen, M.-L., Application of the Elovich equation to the kinetics of metal sorption with solvent-impregnated resins. *Industrial & Engineering Chemistry Research* **1997**, *36* (3), 813-820.
3. Hatch, C. D.; Wiese, J. S.; Crane, C. C.; Harris, K. J.; Kloss, H. G.; Baltrusaitis, J., Water adsorption on clay minerals as a function of relative humidity: application of BET and Freundlich adsorption models. *Langmuir* **2012**, *28* (3), 1790-1803.

4. Munaweera, I.; Shi, Y.; Koneru, B.; Saez, R.; Aliev, A.; Di Pasqua, A. J.; Balkus, K. J., Chemoradiotherapeutic Magnetic Nanoparticles for Targeted Treatment of Nonsmall Cell Lung Cancer. *Molecular Pharmaceutics* **2015**, *12* (10), 3588-3596.
5. Gao, X.; Chen, L.; Xie, J.; Yin, Y.; Chang, T.; Duan, Y.; Jiang, N., In vitro controlled release of vitamin C from Ca/Al layered double hydroxide drug delivery system. *Materials Science and Engineering: C* **2014**, *39*, 56-60.
